# Supplementary material
Source: Springer Nature journal article supplement (https://www.springermedizin.de/resource/supplementary/12913_2012_2415_MOESM3_ESM.pdf/9530468)

**A** Thyolo - Malawi  
Probability of *Mortality* while on ART – 0m

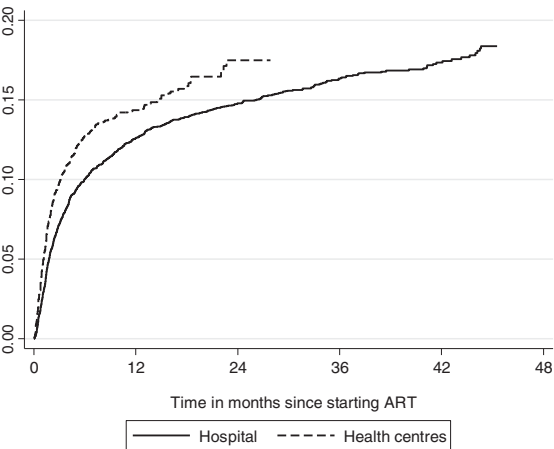

**B** Probability of *Mortality* while on ART – >12m

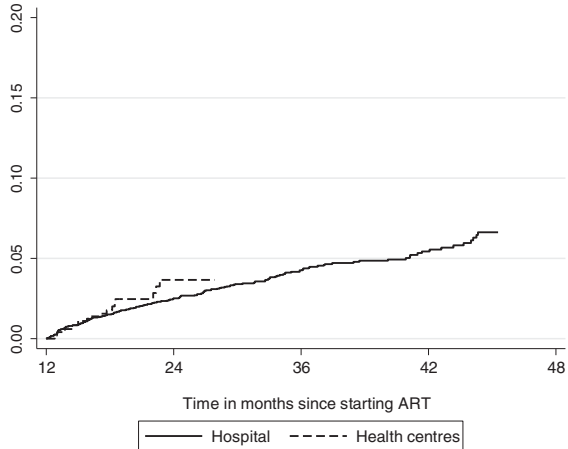

**C** Buhera - Zimbabwe  
Probability of *Mortality* while on ART – 0m

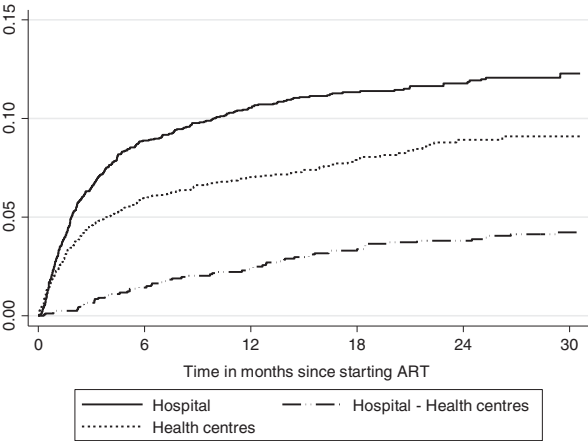

**D** Probability of *Mortality* while on ART – >12m

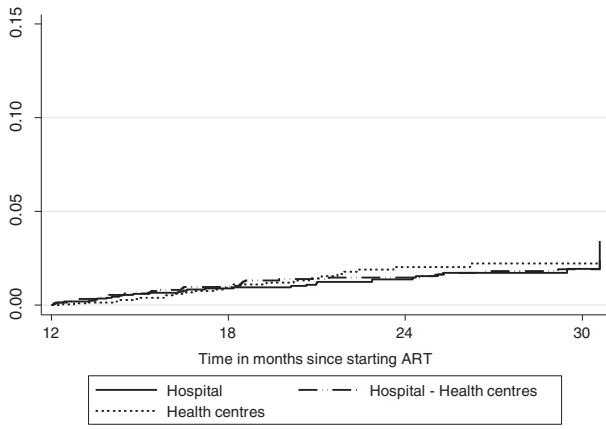

Supplement: MOESM3 [file 9530468]
